# Supplementary figures and images for: Impact of Cervical Spine Positioning on Dry Needling Safety: Cadaveric Evidence of Reduced Spinal Canal Perforation
Source: Research Square preprint supplement (doi:10.21203/rs.3.rs-7365707/v1), 2026-01-14

**SUPPLEMENTAL MATERIAL, 1. INCLINOMETER IN NEUTRAL**


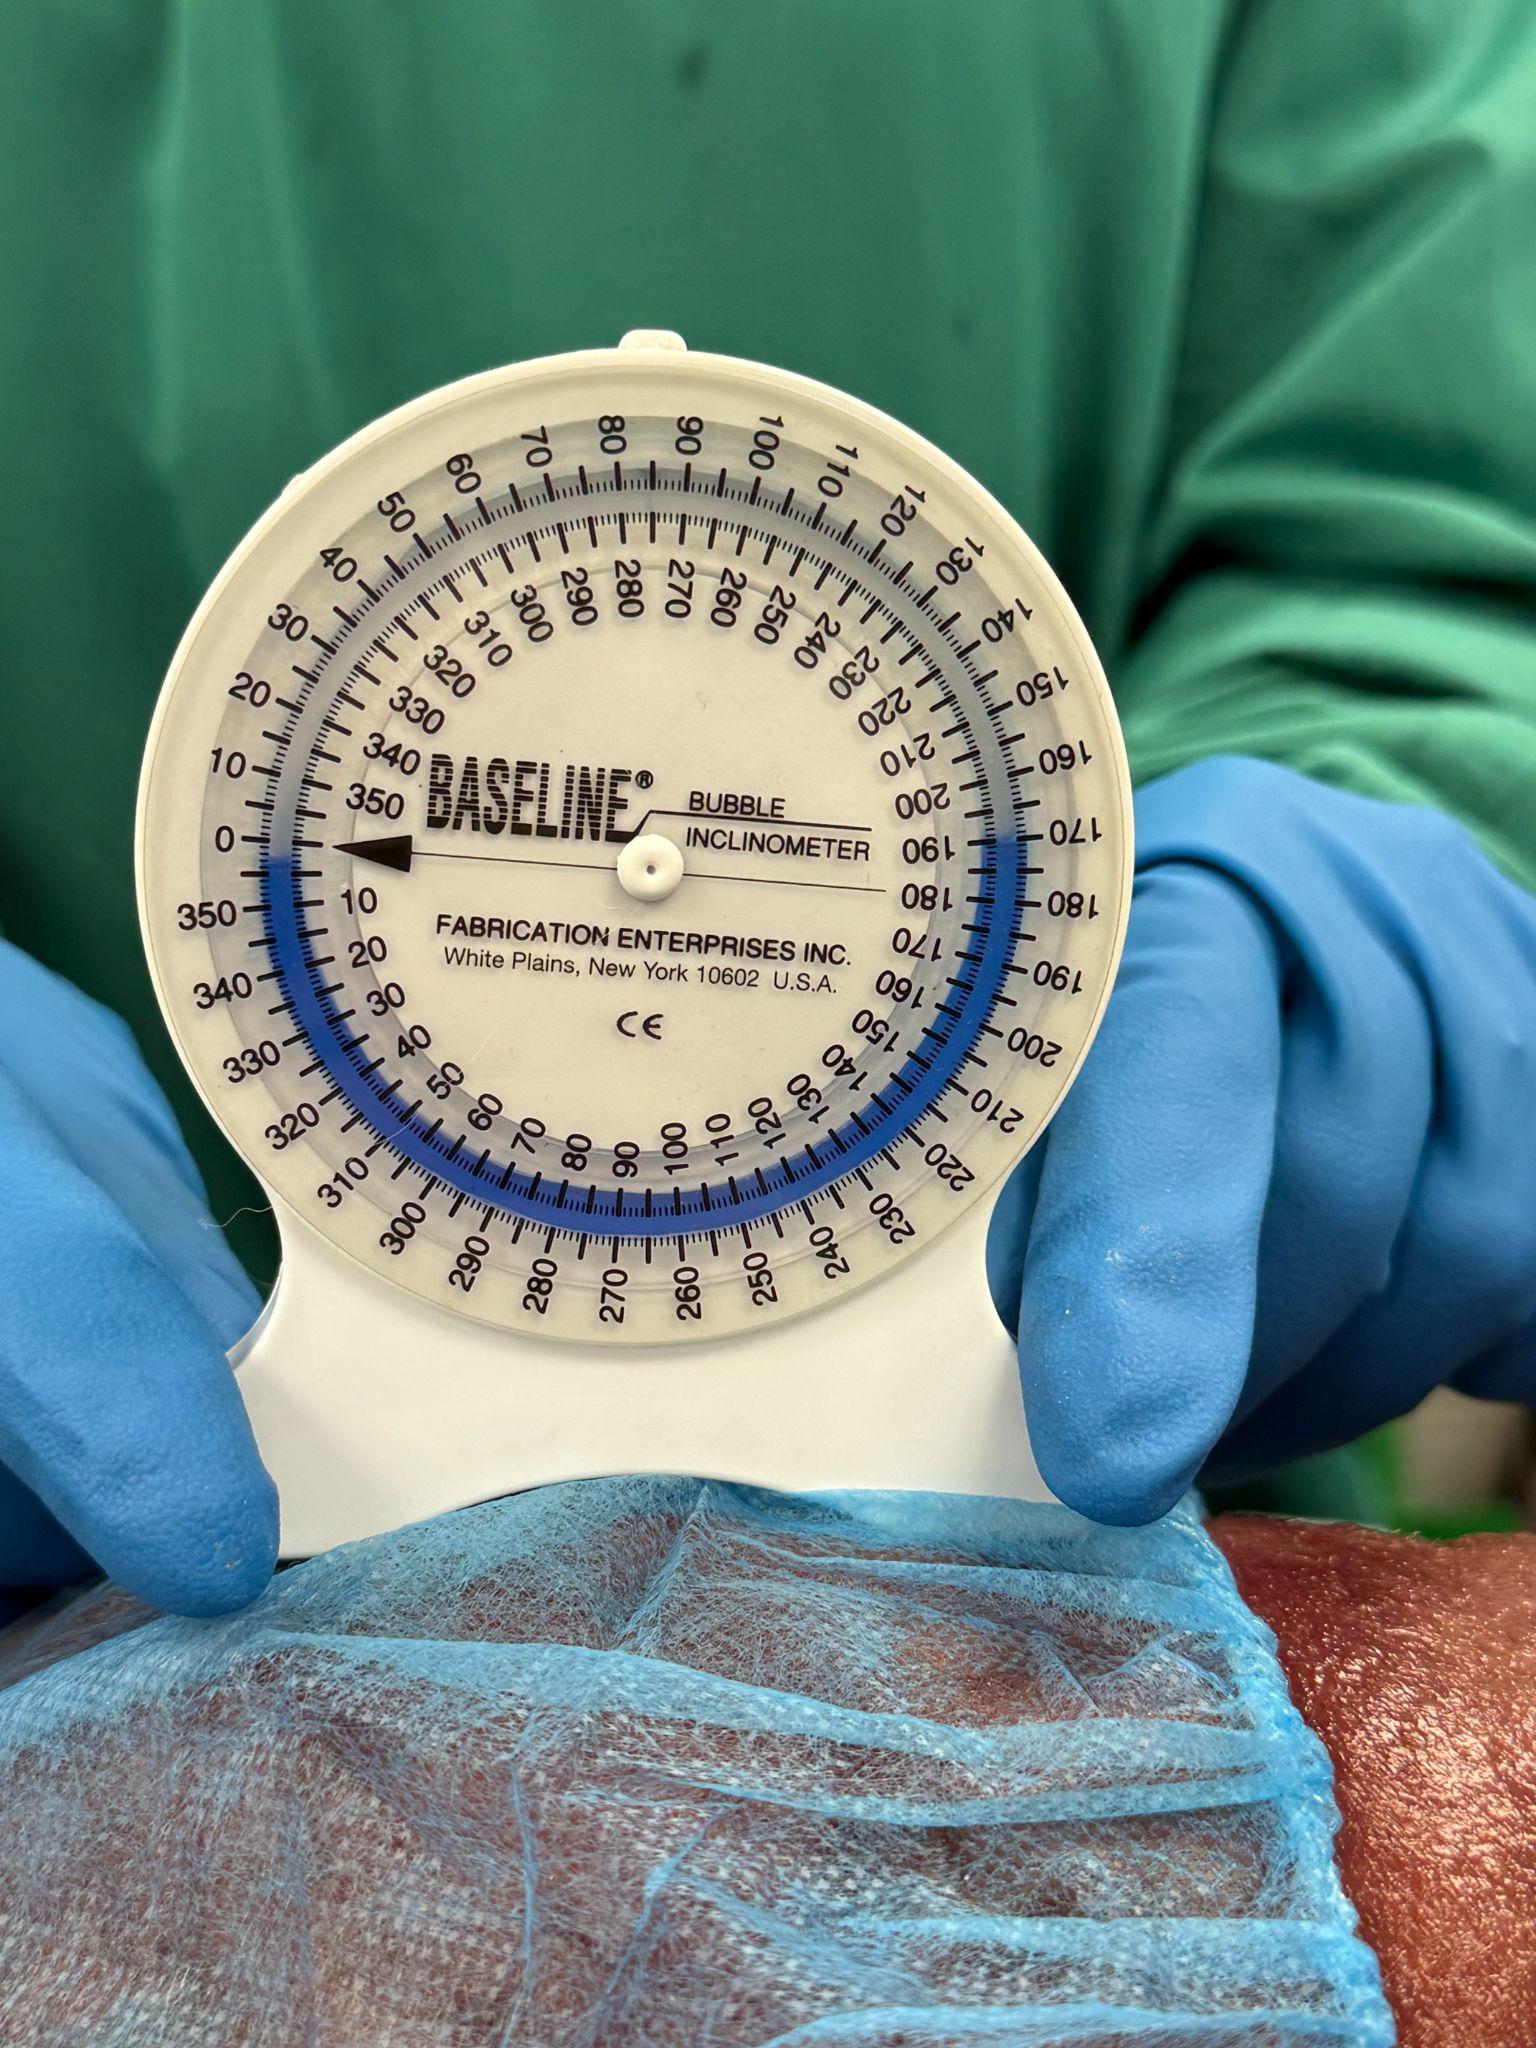

Supplement: Supplementary file 1 [file 65f9a90669d009629c0932d5.docx]
